# Supplementary material
Source: Springer Nature journal article supplement (https://www.springermedizin.de/resource/supplementary/12943_2009_565_MOESM4_ESM.pdf/9554982)
Supplement: MOESM4 [file 9554982]

## (A) Exon-intron structure of ZAR2 pre-mRNA

Part of antisense of *BRCA2*

Exon1 (111 bp)

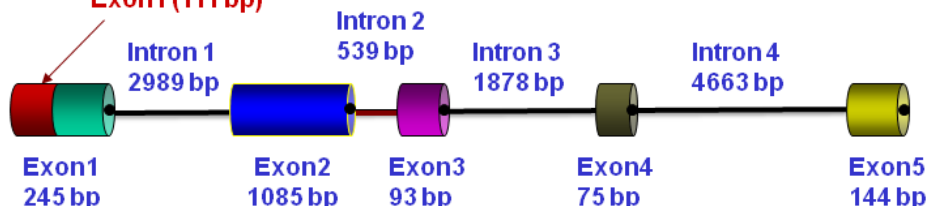

## (B) Nucleotide sequence of human ZAR2 mature mRNA.

```
GCTTCTCCCGCGGCGACCCACCGCCGCAAAAGACACCCGAGGCGCAGCAGAGGCGCAGCAGTGCCACAG
CGGCTCCGCCTCTGCCGCCTAGTTTCAGAAAGCTCGCGCCACAGCCCGCGCTGGCCACGTGACGCCGTGA
CGCGACACGCAGCACACGCACCACCCGGAAGTCAGGCCCTGGGTGGGCCGCTCGCGGGTATTTCTCAGTGTG
GCGAAAGGAAATTCTTGTGCAGGCATCCCAACCGTGAACCTTCATACTGTTGTCCATAATGGCTGTACCT
TAAACATTATCTAACATTACCACATTACCTTACAAAGGATCTTTAGAATGGTCACTACAGGAATATATG
AATTAATCTACTAATTAAGCATGTGTGAATAAGCTGGAAATGAAAAACAGCTTTGAAAAAAGATTCC
CGAACAGTGAAGAGGTAGGAAAAAGCAATTAGGTAGGAATCAGGTGGCAATTAGACATCTGTAGATAGAG
CTTCTCTCCCTCAATCAGGGTAATAAGCAGCAGCTCCCATTAGAATCTGAAATAAATGGAGAAGCCAGGA
ATGAATCTGAACCAACCTGATGAAGAGAAAGAAGGGGCGGATGAAGGAGGAAGGCAAAATAAGGACCCAA
ACAAACTGGCTAGGATATTAGACTGCGCCTGAGCACCTGAGAGCGGATGGAGCGCTTTGTCCGTGTTCCC
TATGGCTTGTAACCAGGGTTATGGGAGCACAGTGCCTTTGGGCCAGCCTGGACTCTCAGGGCACAAACAGC
CCGACTGGAGGCAAAAATATGGGTCTCCCACTTTTCTGGCCAGGCCAGGGCTGCTGGTGCCCGCGAACGC
CCCTGACTACTGCATTTGACCTTCAAGAGGGCGCAGCTTAAGGCCATTCTCTCCAGATGAACCCAGC
CTGAGCCCTCGGGCTGTGCAAGCCCAACCAAGAGGTTGGCGCTGACAGTTGACCCCGCGGGTGGACAAGG
CTGTGCAGTGCTCTCTGGGGCTCGCACCCCTCAGCAGCTGCTCCCCTGGGACGGCAGAGACCCCCAGGA
GCCCTTGCAGCCTGTGGGGTCACTTCGCCGCCACCGGCCGAGGGGCTTGATCCGCCTGCGGAGAGAT
GGGGACGAAGCGGAGAGCAAGGCCTCCCGGGCCCTGCGGAGGCCAGCCAGCCGAGCCACCATCACGGA
GGTCAGGAGCTGACAGGCAAGGAGGAGCCCGGGCAGCTGGAGGAATCGGGGGAGAAAGACGCCCCGTGCC
TCAGGAGACGAAGACAAGCAGGTGCCCTGGAGACGCCGCTCCGAGCCGCTCCGGAGGCCAACTTCCAG
TTTTTGGAAACCAAAATATGGCTATTTCCACTGTAAAGATGTAAAGACCAGGTGGGAGAGTGTCTACGTGT
GGTGCAATTTCTGGAACGAACAAGGTTTATTTCAACAACCTGTTGTAAATGCCAAAAGAGTTTTTAACC
TTATCGAGTAGAAGCAATCCAATGTCAGACTGCTCAAAGTCTCATTGTTCTGTCTCAAAGGAAGAGA
CACATTGATCTAAGGAGGCCTCATCGACAGGAAGTGTGTGGTTCGCTGCAAAGACAAGAGATTCCTCTGTG
GCAATATTTACAGCTTTAAATATGTGATGTGACTTGTACAGTGTGACTTGTAAATGGACCCCTGAGCTCTT
CTTGTAACCTACTGTGCTGCTTCTCTTTTTTGCAACTTGGCTCTGACCTGGCATCGGAAAATGGCTAGGC
TTTTGTACTTTTTGTAGATTGTGTAACAATGTGACAATGTGAATAGAATAAAATAAATGCATGTGAACTA
```
